# Supplementary material for: {Mo4}-directed structural evolution of highly reduced molybdenum red clusters for efficient proton conduction
Source: Royal Society of Chemistry journal article supplement (doi:10.1039/d4dt00187g), 2024-01-01
Supplement: d4dt00187g1.pdf [file d4dt00187g1.pdf]

## Supplementary Information

# **{Mo<sub>4</sub>}-Directed Structural Evolution of Highly Reduced Molybdenum Red Clusters for Efficient Proton Conduction**

Bingbing Li <sup>a</sup>, Yuxin Lan <sup>a</sup>, Heyang Su <sup>a</sup>, Jiaxin Xu <sup>a</sup>, Qixin Zhao <sup>a</sup>, Yubin Ma <sup>a</sup>, Qi Zheng <sup>\*b</sup>,  
and Weimin Xuan <sup>\*a</sup>

<sup>a</sup>State Key Laboratory for Modification of Chemical Fibers and Polymer Materials & College of Chemistry and Chemical Engineering, Donghua University, Shanghai 201620, P R China. E-mail: weiminxuan@dhu.edu.cn

<sup>b</sup>State Key Laboratory for Modification of Chemical Fibers and Polymer Materials & College of Materials Science and Engineering, Donghua University, Shanghai 201620.P R China. E-mail: qi.zheng@dhu.edu.cn

### Contents

|                                                                     |    |
|---------------------------------------------------------------------|----|
| <b>1. Materials</b> .....                                           | 2  |
| <b>2. Instrumentation</b> .....                                     | 2  |
| <b>3. Synthesis</b> .....                                           | 4  |
| <b>4. Crystallographic data and crystal structures of 1-3</b> ..... | 5  |
| <b>5. PXRD spectra of 1-3</b> .....                                 | 12 |
| <b>6. TGA results of 1-3</b> .....                                  | 12 |
| <b>7. FT-IR spectra of 1-3</b> .....                                | 13 |
| <b>8. Raman spectra of 1-3</b> .....                                | 13 |
| <b>9. X-ray photoelectron spectra (XPS) of 1-3</b> .....            | 13 |
| <b>10. UV-Vis spectra of 1-3</b> .....                              | 15 |
| <b>11. Proton Conduction Results of 1-3</b> .....                   | 15 |
| <b>12. Water adsorption–desorption isotherms of 1-3</b> .....       | 17 |
| <b>13. FT-IR spectra of 1-3 after measurement</b> .....             | 18 |
| <b>14. XRD spectra of 1-3 after measurement</b> .....               | 19 |
| <b>15. References</b> .....                                         | 21 |

## 1. Materials

$K_2MoO_4$  and  $CH_3COONa$  were purchased from Adamas,  $Na_2MoO_4 \cdot 2H_2O$  was purchased from Sinopharm, Hydrazine dihydrochloride was purchased from Bide Pharmatech Ltd. All reagents were of A.R. grade and used without further purification.

## 2. Instrumentation

**Crystallography:** The crystallographic data of compounds were collected using a Bruker D8 venture single crystal diffractometer equipped with a CCD area detector at 1500 W power (50 kV, 30 mA) to generate Mo- $K\alpha$  radiation ( $\lambda=0.71073 \text{ \AA}$ ) at 150 K. The structures were solved by the direct methods and refined with OLEX 2-1.5<sup>[1]</sup>. All non-hydrogen atoms are anisotropically refined by the least square method except for the guest water molecules. CCDC-2325444 (**1**), CCDC-2325445 (**2**), CCDC-2325443 (**3**), contain the supplementary crystallographic data for this paper. These data can be obtained free of charge via [www.ccdc.cam.ac.uk/data\\_request/cif](http://www.ccdc.cam.ac.uk/data_request/cif).

**Element Analyses:** Element analyses were determined by VARIDEL III Elemental Analyzer.

**Inductively Coupled Plasma Optical Emission Spectroscopy (ICP-OES):** Elemental analyses for Mo, Na and K were determined with a Leeman Prodigy Plus inductivity-coupled plasma Inductively Coupled Plasma Optical Emission Spectroscopy (ICP-OES).

**Thermogravimetric Analysis (TGA):** Thermogravimetric analysis was performed on a METTLER TOLEDO TG8000 Thermogravimetric Analyzer under nitrogen flow at a typical heating rate of  $10 \text{ }^\circ\text{C}\cdot\text{min}^{-1}$ .

**Powder X-ray Diffraction (PXRD):** Powder XRD of **1** was recorded on a Haoyuan DX-2700B diffractometer equipped with monochromatized Cu- $K\alpha$  ( $\lambda = 1.5418 \text{ \AA}$ ) radiation in the range of  $5^\circ \leq 2\theta \leq 50^\circ$ , with a scanning rate of  $0.02 \text{ }^\circ\text{s}^{-1}$ . Powder XRD patterns of **2** and **3** were obtained

on D8 Advance diffractometer using Cu K $\alpha$  radiation ( $2\theta = 5-50^\circ$ ).

**Fourier-transform infrared (FT-IR) spectroscopy:** The samples were prepared as a KBr pellet and the FT-IR spectrum was collected in transmission mode in the range of 500-4000  $\text{cm}^{-1}$  using a NEXUS-670 spectrometer. Wavenumbers are given in  $\text{cm}^{-1}$ . Intensities are denoted as w = weak, m = medium, s = strong, vs = very strong, br = broad.

**Solid-state UV-Vis absorption spectroscopy:** All compounds were prepared into powders, which were tested in wavelength mode by integrating sphere attachment in UV3600 UV-Vis spectrometer.

**Water adsorption:** Water vapor adsorption isotherms were measured at 298.15 K on a BSD-660M A6B6M adsorptometer (Beishide Instruments).

**Proton conductivity characterization:** The AC impedance test is performed at the electrochemical workstation (CHI 760E) in a standard three-electrode system, with a frequency range of 0.1 Hz-106 Hz and an AC voltage of 50 mV, to test the proton conductivity of **1**, **2** and **3**. As a result of the impedance data being equivalent to the ZSimpWin software, a Nyquist graph can be generated. Measurements were performed at: (1) 25  $^\circ\text{C}$  and various humidities (53%-98% RH); (2) 98% RH and various temperatures (25  $^\circ\text{C}$  - 70  $^\circ\text{C}$ ). The proton conductivity was calculated using the following equation.

$$\sigma = \frac{L}{SR}$$

where  $\sigma$  is the ion conductivity,  $L$  is the thickness,  $R$  is the resistance of the pellet, and  $S$  is the area of the pellet. Activation energy ( $E_a$ ) can be calculated using the formula.

$$\sigma T = \sigma_0 \exp\left(\frac{-E_a}{k_B T}\right)$$

where  $\sigma_0$  is the pre-exponential factor,  $k_B$  is the Boltzmann constant, and  $T$  is the temperature.

### 3. Synthesis

#### Synthesis of $\text{K}_6\text{Na}_8\text{H}_2[\text{Mo}^{\text{V}}_{12}\text{Mo}^{\text{VI}}_{16}\text{O}_{84}]\cdot 30\text{H}_2\text{O}$ (**1**).

$\text{K}_2\text{MoO}_4$  (0.476 g, 2 mmol) and  $\text{N}_2\text{H}_4\cdot 2\text{HCl}$  (0.011g 0.1mmol) were added to a solution of  $\text{CH}_3\text{COONa}$  (0.328 g, 4 mmol) in water (3.5 mL). The mixture was then acidified to pH 6.35 with 6 M HCl and stirred for over 30 min. Subsequently, the Mo-containing aqueous solution was transferred to a 10 mL glass vial, which was heated to 80 °C and kept for three days. The reaction mixture was filtered, the filtrate was collected and was kept in an open 15 ml beaker for about two days. The dark red crystals were collected and washed with acetonitrile. Yield: 26 mg (20 % based on Mo). IR ( $\text{cm}^{-1}$ ): 3297(br), 1628 (m), 1552 (m), 1404 (s), 1448 (m), 950 (s), 866 (m), 737 (s), 704 (m), 637 (s), 548 (w). Elemental analysis % calc (found) of **1**: H 1.25 (1.29); K 4.70 (4.58); Na 3.68 (3.72); O 36.54 (36.66); Mo 53.82 (53.75).

#### Synthesis of $\text{Na}_8\text{H}_6[\text{Mo}^{\text{V}}_{24}\text{Mo}^{\text{VI}}_6(\text{OH})_{10}\text{O}_{80}]\cdot 36\text{H}_2\text{O}$ (**2**) and

#### $\text{Na}_{14}\text{H}_6[\text{Mo}^{\text{V}}_{32}\text{Mo}^{\text{VI}}_8(\text{OH})_{12}\text{O}_{108}]\cdot 50\text{H}_2\text{O}$ (**3**).

$\text{Na}_2\text{MoO}_4 \cdot 2\text{H}_2\text{O}$  (0.484 g, 2 mmol) and  $\text{N}_2\text{H}_4\cdot 2\text{HCl}$  (0.026g 0.25mmol) were added to a solution of  $\text{CH}_3\text{COONa}$  (0.328 g, 4 mmol) in water (3.5 mL). The mixture was then acidified to pH 6.50 with 6 M HCl and stirred for over 30 min. Subsequently, the Mo-containing aqueous solution was transferred to a 10 mL glass vial, which was heated to 80 °C and kept for two days. On concentration of the mixture, several fractions precipitated: first, a yellow precipitate, then red rod crystals of **2**, followed by dark red diamond crystals of **3**. The mixture was washed several times with isopropanol aqueous solution, and finally dried over air. The individual crystal fractions could only be separated mechanically from one another. Yield: 135 mg (ca. 65% **2** and ca. 35% **3**). IR of **2** ( $\text{cm}^{-1}$ ): 3437 (br), 1621 (m), 1411 (w), 1066 (w), 946 (vs), 889 (w), 835 (w), 744 (m), 701 (m), 578 (w). IR of **3** ( $\text{cm}^{-1}$ ): 3325 (br), 1629 (s), 1551 (m), 1413 (w), 939 (vs), 825 (s), 721 (m), 692 (m), 634 (w), 574 (w). Elemental analysis % calc (found) of **2**: H 1.72 (1.75); Na 3.56 (3.26); O 39.02 (39.27); Mo 55.71 (55.72). Elemental analysis % calc (found) of **3**: H 1.82 (1.79); Na 3.33 (3.42); O 39.34 (39.17); Mo 55.51 (55.62).

#### 4. Crystallographic data and crystal structures of 1-3

**Table S1** Crystallographic Details for **1**

| Compound                                                                                         | <b>1</b>                       |
|--------------------------------------------------------------------------------------------------|--------------------------------|
| Empirical formula                                                                                | $K_6Na_8H_{106}Mo_{28}O_{136}$ |
| Formula weight                                                                                   | 5386.66                        |
| Crystal system                                                                                   | Triclinic                      |
| Space group                                                                                      | <i>P</i> -1                    |
| <i>a</i> /Å                                                                                      | 11.4876(3)                     |
| <i>b</i> /Å                                                                                      | 17.1451(6)                     |
| <i>c</i> /Å                                                                                      | 32.3504(11)                    |
| $\alpha$ /°                                                                                      | 103                            |
| $\beta$ /°                                                                                       | 93                             |
| $\gamma$ /°                                                                                      | 102                            |
| <i>V</i> /Å <sup>3</sup>                                                                         | 6010.1(3)                      |
| <i>Z</i>                                                                                         | 2                              |
| $\rho_{cal}$ /g·cm <sup>-3</sup>                                                                 | 2.975                          |
| $\mu$ (MoK $\alpha$ )/mm <sup>-1</sup>                                                           | 3.185                          |
| <i>F</i> (000)                                                                                   | 5138                           |
| 2 $\theta$ range /°                                                                              | 1.958 to 25.349°               |
|                                                                                                  | -13<= <i>h</i> <=13            |
| Index ranges                                                                                     | -20<= <i>k</i> <=20            |
|                                                                                                  | -38<= <i>l</i> <=38            |
| Reflections collected                                                                            | 134317                         |
| Data / restraints / parameters                                                                   | 21788 / 6 / 1559               |
| <i>R</i> <sub>1</sub> / <i>wR</i> <sub>2</sub> ( <i>I</i> >2 $\sigma$ ( <i>I</i> )) <sup>a</sup> | 0.0398/0.0950                  |
| <i>R</i> <sub>1</sub> / <i>wR</i> <sub>2</sub> (all data)                                        | 0.0532/0.1053                  |
| GooF (all data) <sup>b</sup>                                                                     | 1.018                          |
| Data completeness                                                                                | 99.0 %                         |

$$^aR_1 = \sum ||F_o| - |F_c| | / \sum |F_o|; wR_2 = \{ \sum w[(F_o)^2 - (F_c)^2]^2 / \sum w[(F_o)^2]^2 \}^{1/2}$$

$$^bGooF = \{ \sum w[(F_o)^2 - (F_c)^2]^2 / (n-p) \}^{1/2}$$

**Table S2** Crystallographic Details for **2**

| Compound                                                                                          | <b>2</b>                                                           |
|---------------------------------------------------------------------------------------------------|--------------------------------------------------------------------|
| Empirical formula                                                                                 | Na <sub>8</sub> H <sub>106</sub> Mo <sub>30</sub> O <sub>135</sub> |
| Formula weight                                                                                    | 5328.91                                                            |
| Crystal system                                                                                    | Triclinic                                                          |
| Space group                                                                                       | <i>P</i> -1                                                        |
| <i>a</i> /Å                                                                                       | 17.5249(13)                                                        |
| <i>b</i> /Å                                                                                       | 19.2536(17)                                                        |
| <i>c</i> /Å                                                                                       | 20.5386(19)                                                        |
| <i>α</i> /°                                                                                       | 117                                                                |
| <i>β</i> /°                                                                                       | 92                                                                 |
| <i>γ</i> /°                                                                                       | 90                                                                 |
| <i>V</i> /Å <sup>3</sup>                                                                          | 6139.8(9)                                                          |
| <i>Z</i>                                                                                          | 2                                                                  |
| $\rho_{\text{calc}}/\text{g}\cdot\text{cm}^{-3}$                                                  | 2.860                                                              |
| $\mu(\text{MoK}\alpha)/\text{mm}^{-1}$                                                            | 3.105                                                              |
| <i>F</i> (000)                                                                                    | 5016                                                               |
| 2 $\theta$ range /°                                                                               | 1.978 to 25.426°                                                   |
|                                                                                                   | -21 ≤ <i>h</i> ≤ 20                                                |
| Index ranges                                                                                      | -23 ≤ <i>k</i> ≤ 23                                                |
|                                                                                                   | -24 ≤ <i>l</i> ≤ 24                                                |
| Reflections collected                                                                             | 145349                                                             |
| Data / restraints / parameters                                                                    | 22517 / 2734 / 1495                                                |
| <i>R</i> <sub>1</sub> / <i>wR</i> <sub>2</sub> ( <i>I</i> > 2 $\sigma$ ( <i>I</i> )) <sup>a</sup> | 0.0957 / 0.1974                                                    |
| <i>R</i> <sub>1</sub> / <i>wR</i> <sub>2</sub> (all data)                                         | 0.1087 / 0.2036                                                    |
| GooF (all data) <sup>b</sup>                                                                      | 1.117                                                              |
| Data completeness                                                                                 | 99.7 %                                                             |

$$^a R_1 = \sum ||F_o| - |F_c|| / \sum |F_o|; wR_2 = \{ \sum w[(F_o)^2 - (F_c)^2]^2 / \sum w[(F_o)^2]^2 \}^{1/2}$$

$$^b \text{GooF} = \{ \sum w[(F_o)^2 - (F_c)^2]^2 / (n-p) \}^{1/2}$$

**Table S3** Crystallographic Details for **3**

| Compound                                                                                          | <b>3</b>                                                            |
|---------------------------------------------------------------------------------------------------|---------------------------------------------------------------------|
| Empirical formula                                                                                 | Na <sub>14</sub> H <sub>140</sub> Mo <sub>40</sub> O <sub>181</sub> |
| Formula weight                                                                                    | 7196.52                                                             |
| Crystal system                                                                                    | Tetragonal                                                          |
| Space group                                                                                       | <i>I4<sub>1</sub>/amd</i>                                           |
| <i>a</i> /Å                                                                                       | 20.542(4)                                                           |
| <i>b</i> /Å                                                                                       | 20.542(4)                                                           |
| <i>c</i> /Å                                                                                       | 41.600(8)                                                           |
| <i>α</i> /°                                                                                       | 90                                                                  |
| <i>β</i> /°                                                                                       | 90                                                                  |
| <i>γ</i> /°                                                                                       | 90                                                                  |
| <i>V</i> /Å <sup>3</sup>                                                                          | 17548(6)                                                            |
| <i>Z</i>                                                                                          | 4                                                                   |
| $\rho_{\text{calc}}/\text{g}\cdot\text{cm}^{-3}$                                                  | 2.701                                                               |
| $\mu(\text{MoK}\alpha)/\text{mm}^{-1}$                                                            | 2.906                                                               |
| <i>F</i> (000)                                                                                    | 13544                                                               |
| 2 $\theta$ range /°                                                                               | 1.958 to 27.528°                                                    |
| Index ranges                                                                                      | -24 ≤ <i>h</i> ≤ 21<br>-24 ≤ <i>k</i> ≤ 24<br>-49 ≤ <i>l</i> ≤ 50   |
| Reflections collected                                                                             | 86489                                                               |
| Data / restraints / parameters                                                                    | 4283 / 23 / 337                                                     |
| <i>R</i> <sub>1</sub> / <i>wR</i> <sub>2</sub> ( <i>I</i> > 2 $\sigma$ ( <i>I</i> )) <sup>a</sup> | 0.0482 / 0.1238                                                     |
| <i>R</i> <sub>1</sub> / <i>wR</i> <sub>2</sub> (all data)                                         | 0.0585 / 0.1298                                                     |
| GooF (all data) <sup>b</sup>                                                                      | 1.135                                                               |
| Data completeness                                                                                 | 99.9 %                                                              |

$$^a R_1 = \sum ||F_o| - |F_c|| / \sum |F_o|; wR_2 = \{ \sum w[(F_o)^2 - (F_c)^2]^2 / \sum w[(F_o)^2]^2 \}^{1/2}$$

$$^b \text{GooF} = \{ \sum w[(F_o)^2 - (F_c)^2]^2 / (n-p) \}^{1/2}$$

Bond valence calculations were performed for each bond using the bond distance ( $R$ ) measured and empirical parameters  $R_0$  and  $B$ : bond valence =  $\text{EXP}((R_0-R)/B)$ . BVS for each metal centre was then summed from all bond valences of the bonds listed. The parameters  $R_0$  and  $B$  were taken from Gagne & Hawthorne. Mo(6+) and Mo(5+) centres were calculated separately using corresponding parameters listed below.

Parameter list:

| Bond     | $R_0$ | $B$   |
|----------|-------|-------|
| Mo(6+)-O | 1.903 | 0.349 |
| Mo(5+)-O | 1.888 | 0.314 |

**Table S4.** BVS values for Mo atoms in compound 1.

| Atom | BVS value    |
|------|--------------|------|--------------|------|--------------|------|--------------|
| Mo1  | <b>4.970</b> | Mo2  | <b>5.022</b> | Mo3  | <b>4.895</b> | Mo4  | <b>4.881</b> |
| Mo5  | <b>5.032</b> | Mo6  | <b>4.941</b> | Mo7  | <b>4.915</b> | Mo8  | <b>4.829</b> |
| Mo9  | <b>4.903</b> | Mo10 | <b>4.971</b> | Mo11 | <b>4.945</b> | Mo12 | <b>4.868</b> |
| Mo13 | <b>4.091</b> | Mo14 | <b>4.928</b> | Mo15 | <b>4.882</b> | Mo16 | <b>4.910</b> |
| Mo17 | <b>5.849</b> | Mo18 | <b>5.931</b> | Mo19 | <b>5.889</b> | Mo20 | <b>5.902</b> |
| Mo21 | <b>6.031</b> | Mo22 | <b>5.931</b> | Mo23 | <b>6.010</b> | Mo24 | <b>5.786</b> |
| Mo25 | <b>5.954</b> | Mo26 | <b>6.075</b> | Mo27 | <b>5.984</b> | Mo28 | <b>5.795</b> |

**Table S5.** BVS values for Mo atoms in compound 2.

| Atom | BVS value    |
|------|--------------|------|--------------|------|--------------|------|--------------|
| Mo1  | <b>4.780</b> | Mo2  | <b>4.841</b> | Mo3  | <b>5.149</b> | Mo4  | <b>4.931</b> |
| Mo5  | <b>4.813</b> | Mo6  | <b>5.100</b> | Mo7  | <b>4.731</b> | Mo8  | <b>4.914</b> |
| Mo9  | <b>5.036</b> | Mo10 | <b>4.914</b> | Mo11 | <b>5.126</b> | Mo12 | <b>4.900</b> |
| Mo13 | <b>4.904</b> | Mo14 | <b>5.044</b> | Mo15 | <b>4.807</b> | Mo16 | <b>4.879</b> |
| Mo17 | <b>4.795</b> | Mo18 | <b>4.999</b> | Mo19 | <b>4.902</b> | Mo20 | <b>4.995</b> |
| Mo21 | <b>4.870</b> | Mo22 | <b>5.019</b> | Mo23 | <b>4.996</b> | Mo24 | <b>4.979</b> |
| Mo25 | <b>5.784</b> | Mo26 | <b>5.661</b> | Mo27 | <b>5.755</b> | Mo28 | <b>5.603</b> |
| Mo29 | <b>5.642</b> | Mo30 | <b>5.696</b> |      |              |      |              |



**Table S6.** BVS values for Mo atoms in compound **3**.

| Atom | BVS value    |
|------|--------------|------|--------------|------|--------------|------|--------------|
| Mo1  | <b>5.815</b> | Mo2  | <b>4.974</b> | Mo3  | <b>4.848</b> | Mo4  | <b>4.774</b> |
| Mo5  | <b>4.949</b> | Mo6  | <b>5.720</b> |      |              |      |              |

**Table S7.** The BVS calculation results of all the protonated oxygen atoms in **2**.

| Oxygen Code | BVS value    | Oxygen Code | BVS value    |
|-------------|--------------|-------------|--------------|
| <b>O4</b>   | <b>1.087</b> | <b>O51</b>  | <b>1.061</b> |
| <b>O6</b>   | <b>1.272</b> | <b>O53</b>  | <b>1.122</b> |
| <b>O8</b>   | <b>0.988</b> | <b>O58</b>  | <b>1.114</b> |
| <b>O15</b>  | <b>1.040</b> | <b>O60</b>  | <b>1.205</b> |
| <b>O17</b>  | <b>1.173</b> | <b>O75</b>  | <b>1.007</b> |

**Table S8.** The BVS calculation results of all the protonated oxygen atoms in **3**.

| Oxygen Code | BVS value    | Oxygen Code | BVS value    |
|-------------|--------------|-------------|--------------|
| <b>O9</b>   | <b>1.240</b> | <b>O13</b>  | <b>0.929</b> |

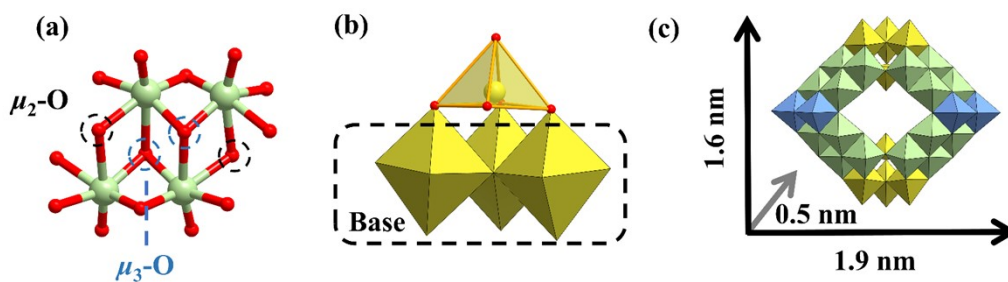

**Fig. S1** (a) The ball-and-stick representation of  $\{\text{Mo}^{\text{V}}_4\}$  unit; (b) The polyhedral representation of  $\{\text{Mo}^{\text{VI}}_4\}$  unit, (c) the outer dimensions of **1** at its most extended points.

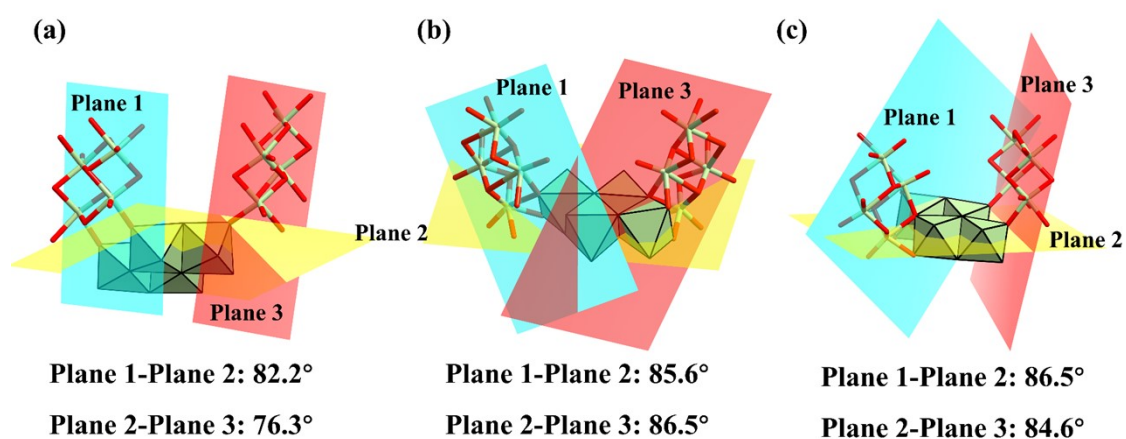

**Fig. S2** Combined polyhedral/ball-and-stick representations of the dihedral angle between neighboring planar  $\{\text{Mo}^{\text{V}}_4\}$  and central  $\{\text{Mo}^{\text{V}}_4\}$  BBs in **1** (a), **2** (b), and **3** (c).

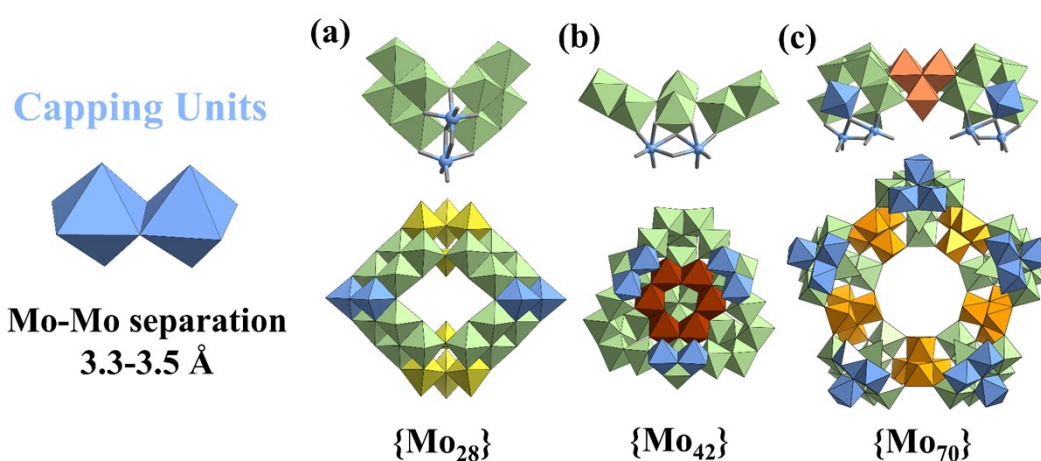

**Fig. S3** The capping units in  $\{\text{Mo}_{28}\}$ ,  $\{\text{Mo}_{42}\}$ ,  $\{\text{Mo}_{70}\}$ . Color code: lime,  $\text{Mo}^{\text{V}}$ ; light blue and yellow,  $\text{Mo}^{\text{VI}}$ ; brown, cyclic  $\{\text{Mo}_6\}$ ; orange, cross-shaped  $\{\text{Mo}_4\}$ .

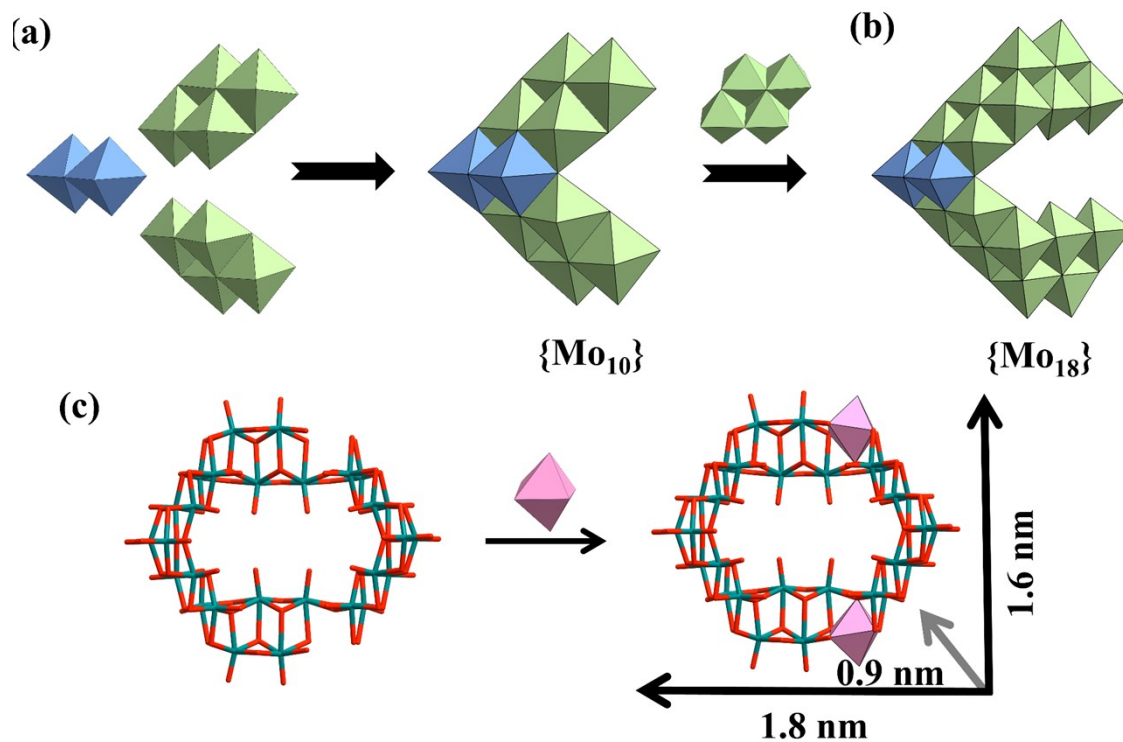

**Fig. S4** The polyhedral representation of the assembly diagram of {Mo<sub>10</sub>} (a) and {Mo<sub>18</sub>} motifs (b); (c) the spatial position of {Mo<sub>1</sub>} add-on units and outer dimensions of 2.

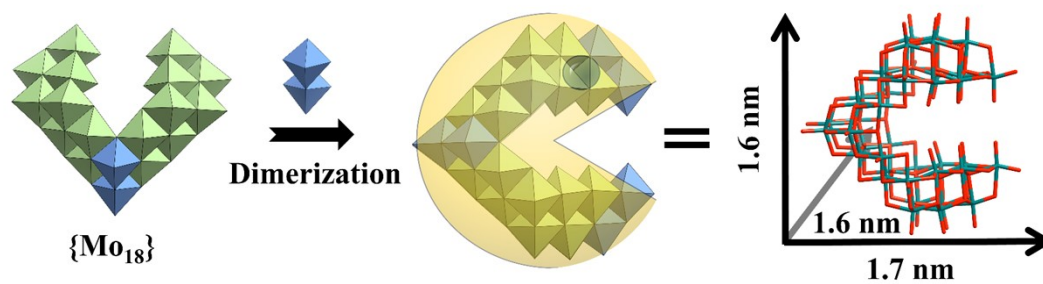

**Fig. S5** The outer dimension of PAC-MAN-shaped 3 at its most extended points.

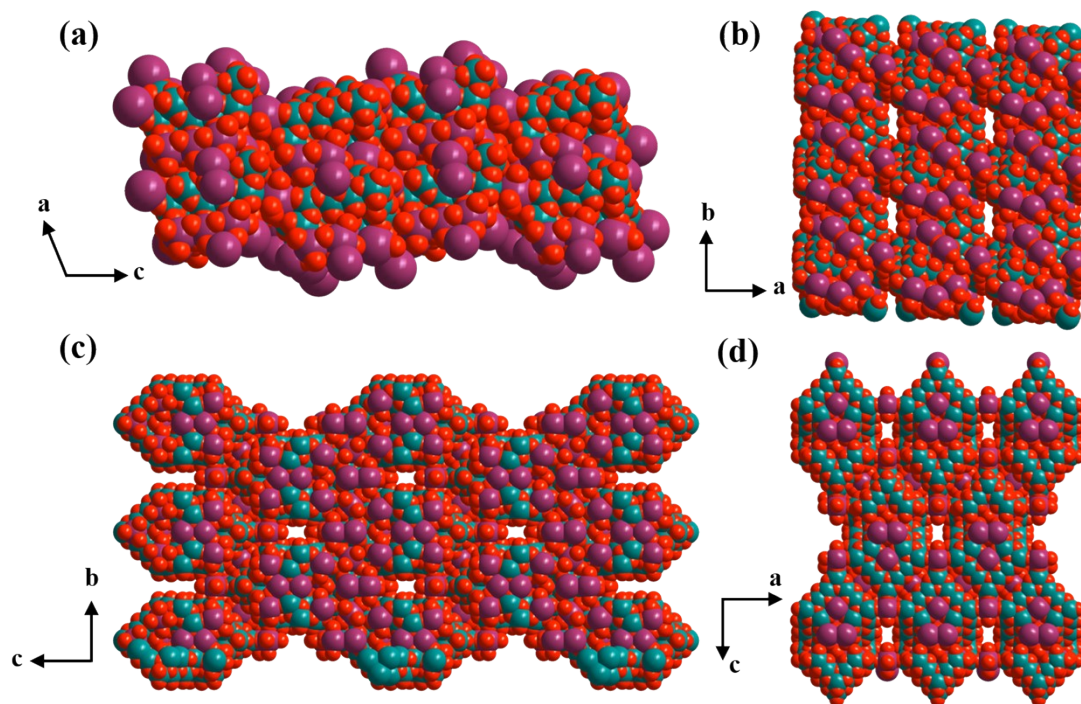

**Fig. S6** (a) Packing model of **1** along the b-axis; (b) Packing model of **2** along the c-axis; (c) Packing model of **3** along the a-axis; (d) Packing model of **3** along the b-axis

## 5. PXRD spectra of 1-3

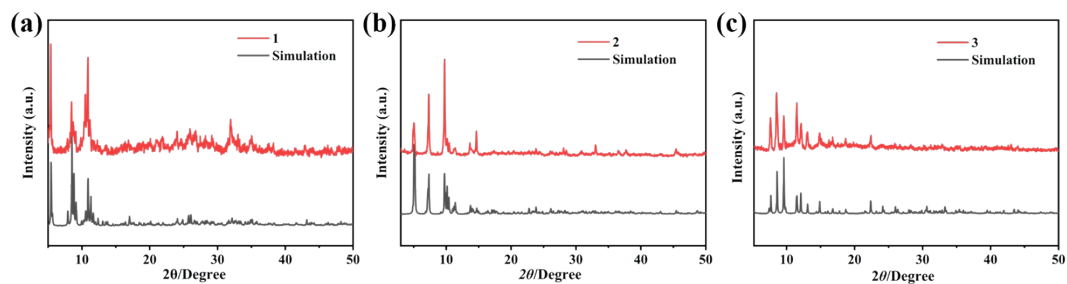

**Fig. S7** Experimental and simulated PXRD patterns of **1-3**.

## 6. TGA results of 1-3

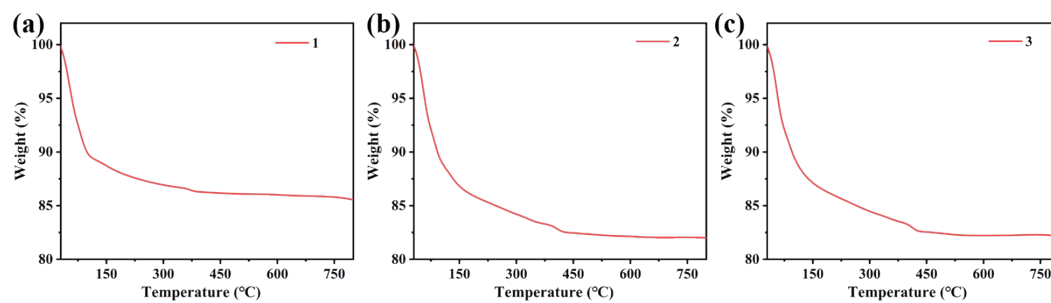

**Fig. S8** TGA curves for **1-3**.

## 7. FT-IR spectra of 1-3

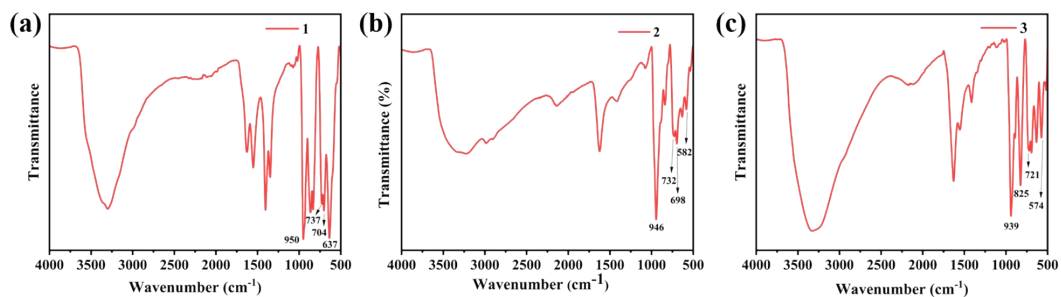

Fig. S9 The FT-IR spectra of 1-3.

## 8. Raman spectra of 1-3

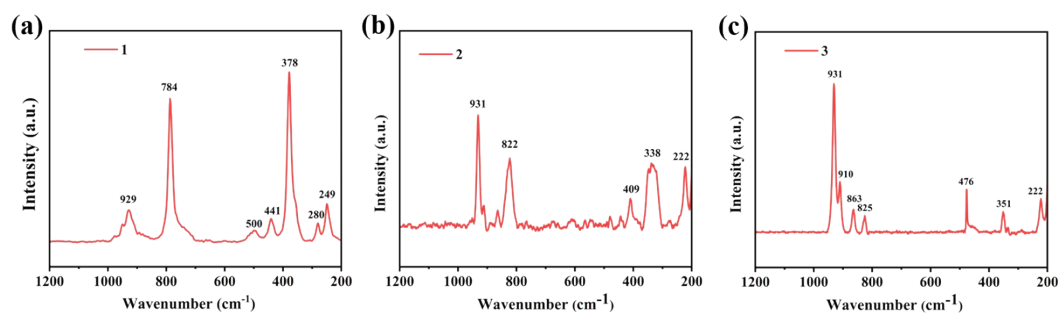

Fig. S10 The Raman spectra of 1-3.

## 9. X-ray photoelectron spectra (XPS) of 1-3

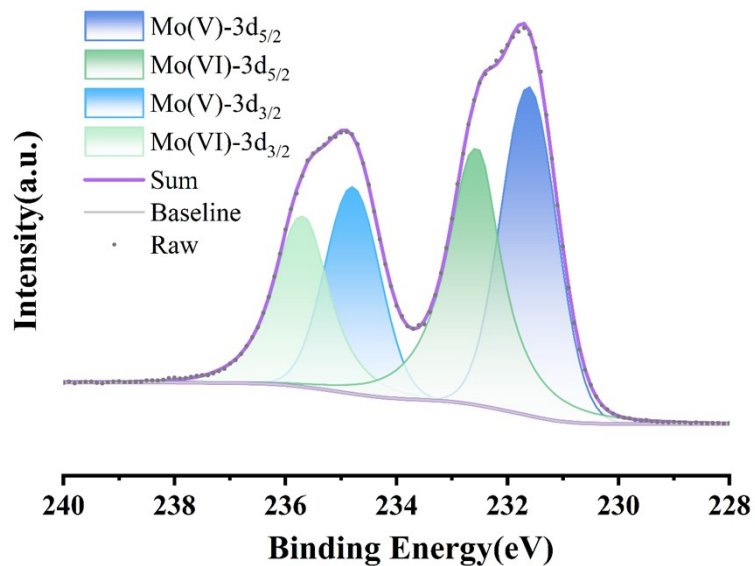

Fig. S11 X-ray photoelectron spectrum of Mo in 1.

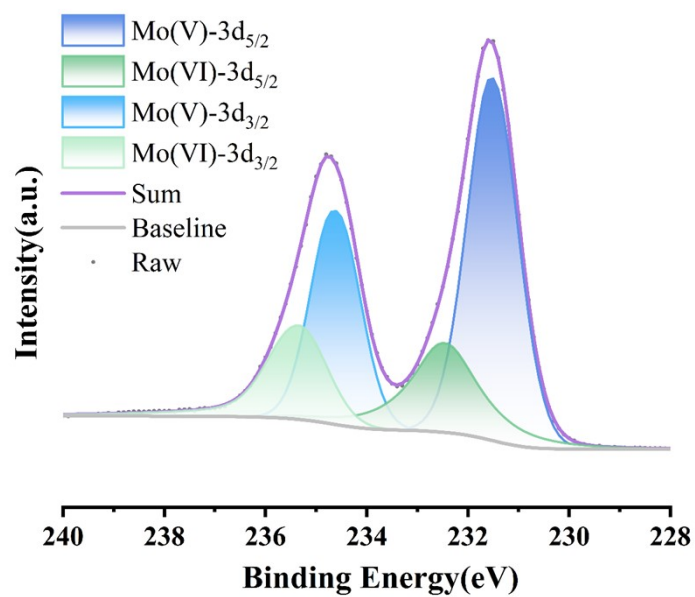

Fig. S12 X-ray photoelectron spectrum of Mo in **2**.

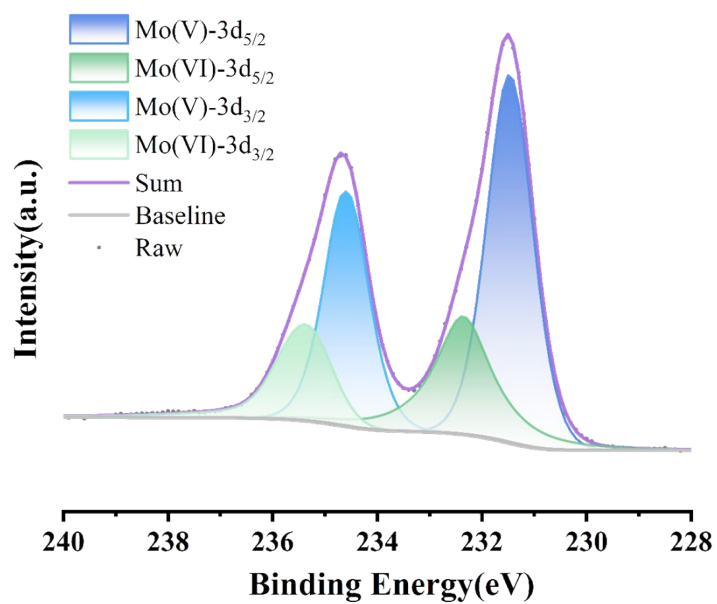

Fig. S13 X-ray photoelectron spectrum of Mo in **3**.

## 10. UV-Vis spectra of 1-3

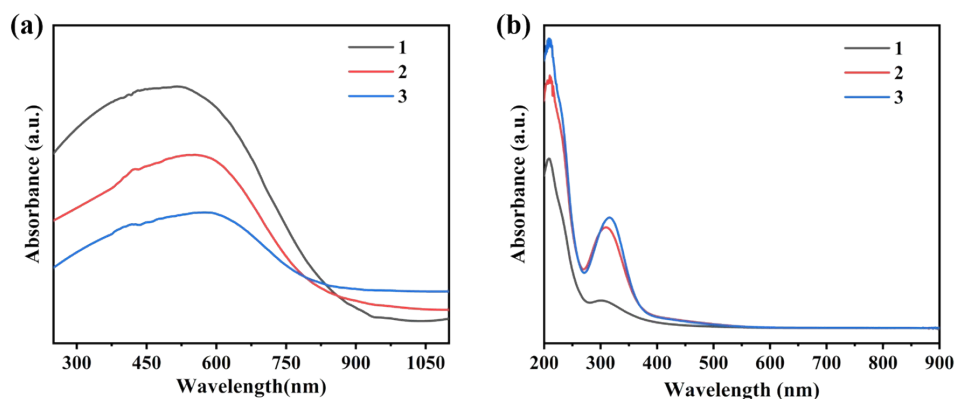

Fig. S14 The Solid (left) and liquid (right) UV-Vis spectra of 1-3.

## 11. Proton Conduction Results of 1-3

Table S9 Resistance ( $R$ ) and proton conductivity ( $\sigma$ ) of 1 under different relative humidities and 25°C.

| RH (%) | $R$ ( $\Omega$ )   | $\sigma$ ( $S\text{ cm}^{-1}$ ) |
|--------|--------------------|---------------------------------|
| 53     | $2.35 \times 10^7$ | $2.17 \times 10^{-8}$           |
| 68     | $8.57 \times 10^6$ | $5.95 \times 10^{-7}$           |
| 75     | $1.67 \times 10^5$ | $3.05 \times 10^{-6}$           |
| 85     | $1.32 \times 10^4$ | $2.44 \times 10^{-5}$           |
| 98     | $8.14 \times 10^2$ | $6.27 \times 10^{-4}$           |

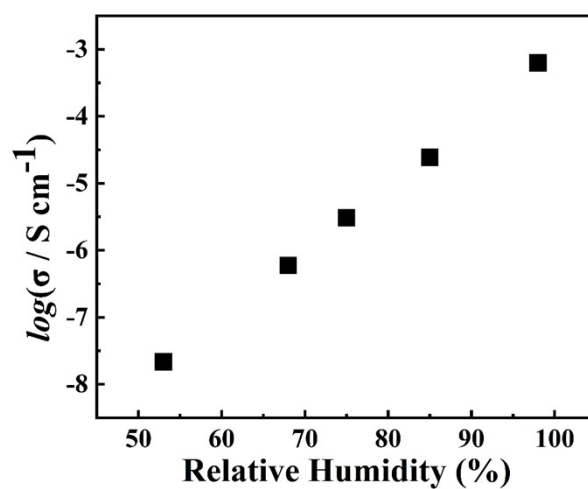

Fig. S15 The scatter plot of the relationship between proton conductivity of compound 1 and different humidities at 25°C.

**Table S10** Resistance ( $R$ ) and proton conductivity ( $\sigma$ ) of **2** under different relative humidities and 25°C.

| RH (%) | $R$ ( $\Omega$ )   | $\sigma$ ( $S\text{ cm}^{-1}$ ) |
|--------|--------------------|---------------------------------|
| 53     | $1.56 \times 10^7$ | $3.28 \times 10^{-8}$           |
| 68     | $2.49 \times 10^6$ | $2.05 \times 10^{-7}$           |
| 75     | $3.52 \times 10^5$ | $1.45 \times 10^{-6}$           |
| 85     | $6.86 \times 10^3$ | $7.44 \times 10^{-5}$           |
| 98     | $7.06 \times 10^2$ | $7.23 \times 10^{-4}$           |

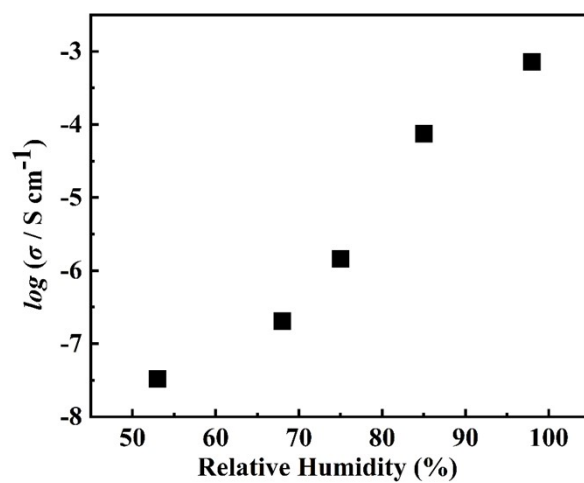

**Fig. S16** The scatter plot of the relationship between proton conductivity of compound **2** and different humidities at 25°C.



**Table S11** Resistance ( $R$ ) and proton conductivity ( $\sigma$ ) of **3** under different relative humidities and 25°C.

| RH (%) | $R$ ( $\Omega$ )   | $\sigma$ ( $S\text{ cm}^{-1}$ ) |
|--------|--------------------|---------------------------------|
| 53     | $1.40 \times 10^7$ | $3.64 \times 10^{-8}$           |
| 68     | $1.32 \times 10^6$ | $3.86 \times 10^{-7}$           |
| 75     | $1.41 \times 10^5$ | $3.63 \times 10^{-6}$           |
| 85     | $8.68 \times 10^3$ | $5.88 \times 10^{-5}$           |
| 98     | $6.25 \times 10^2$ | $8.16 \times 10^{-4}$           |

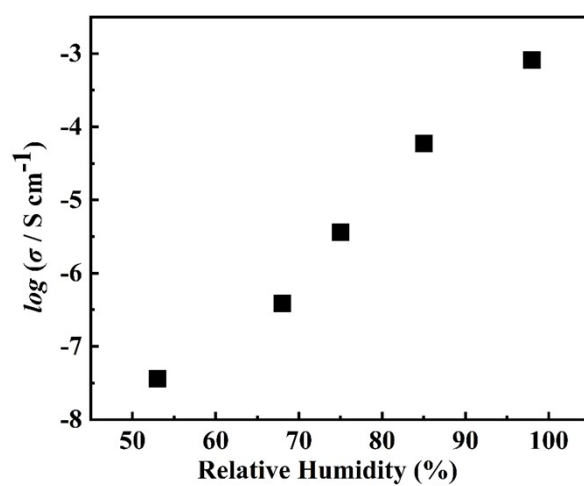

**Fig. S17** The scatter plot of the relationship between proton conductivity of compound **3** and different humidities at 25°C.

## 12. Water adsorption–desorption isotherms of 1-3

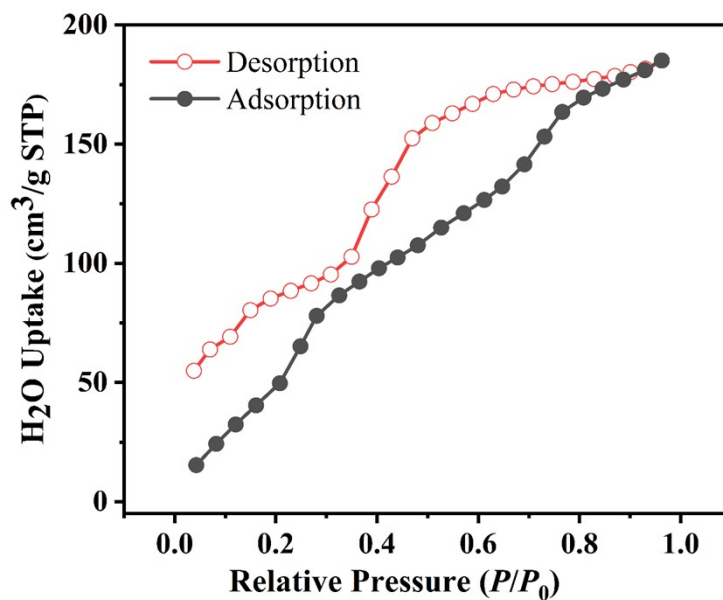

Fig. S18 Water vapor sorption isotherms of 1.

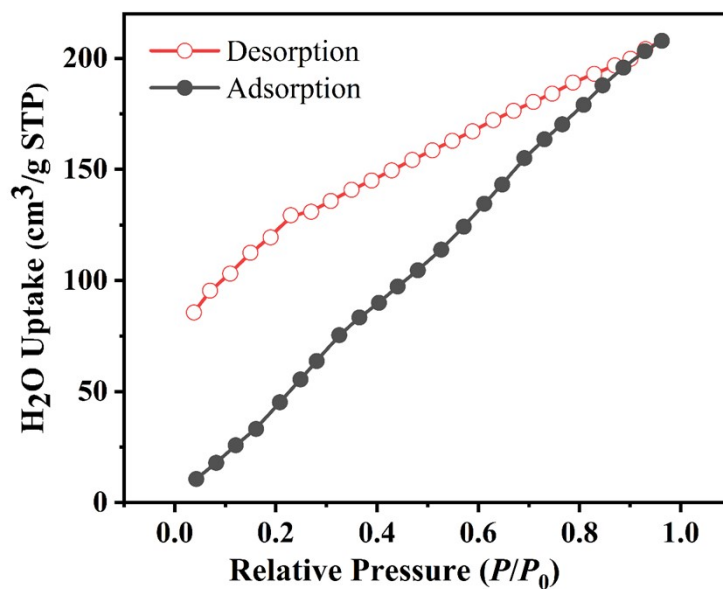

Fig. S19 Water vapor sorption isotherms of 2.

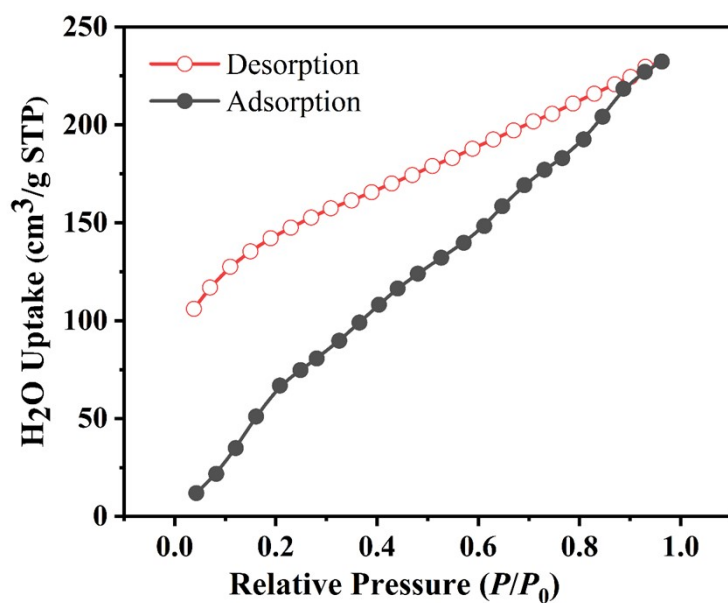

Fig. S20 Water vapor sorption isotherms of **3**.

### 13. FT-IR spectra of 1-3 after measurement

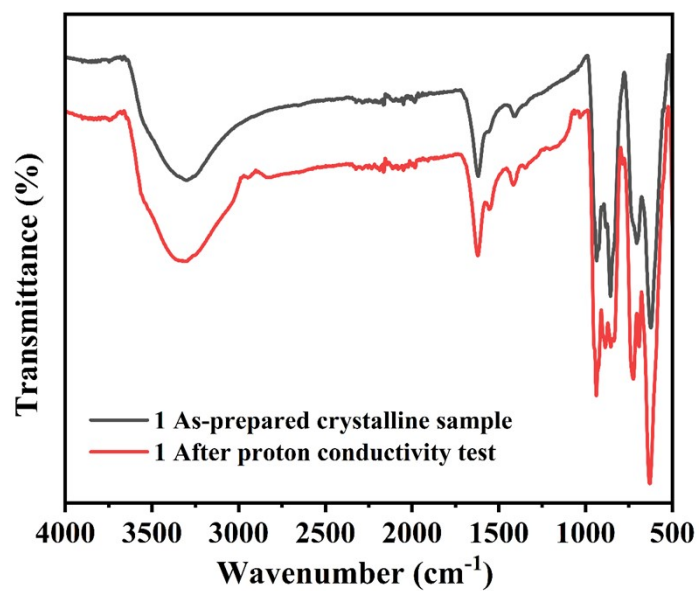

Fig. S21 FT-IR spectra of **1** before and after measurement.

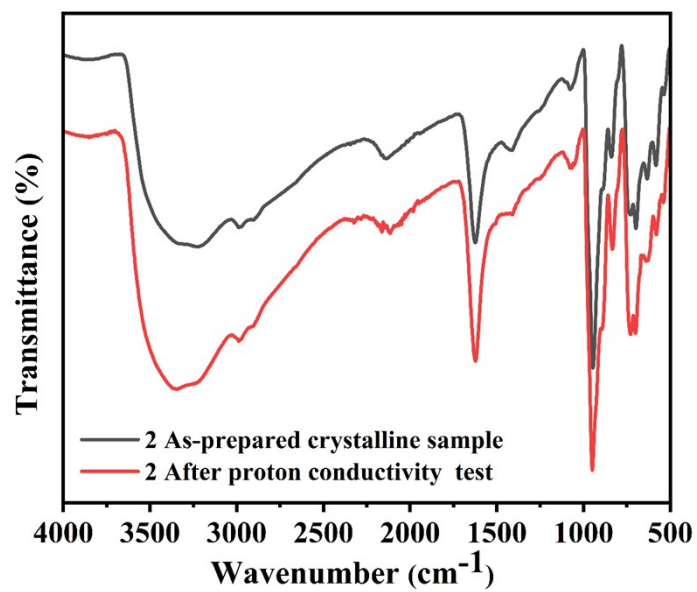

Fig. S22 FT-IR spectra of 2 before and after measurement.

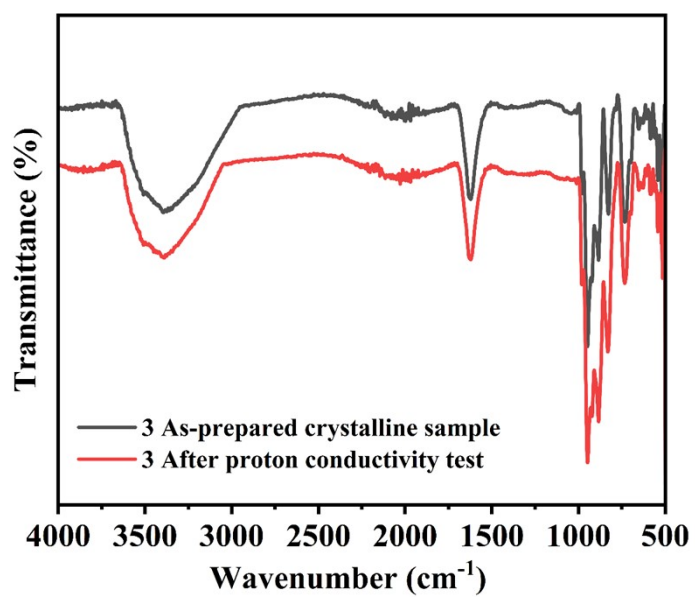

Fig. S23 FT-IR spectra of 3 before and after measurement.

#### 14. XRD spectra of 1-3 after measurement

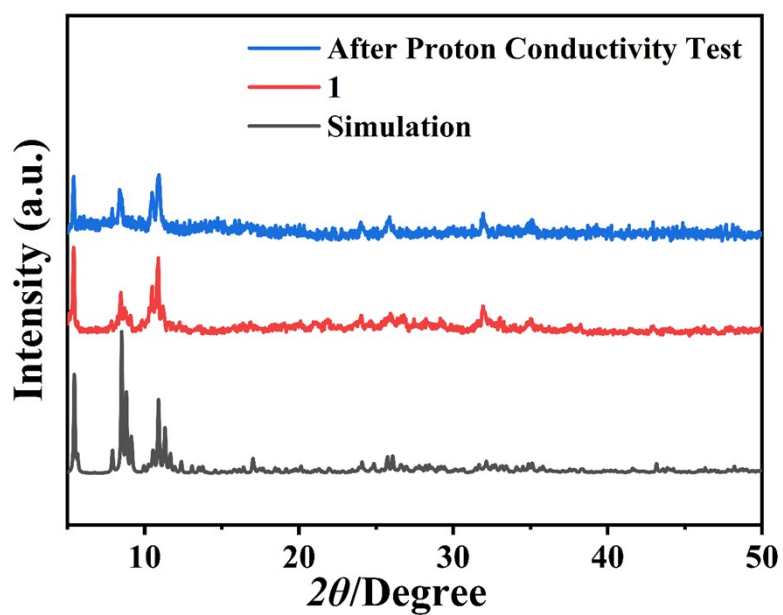

Fig. S24 XRD spectra of 1 before and after measurement.

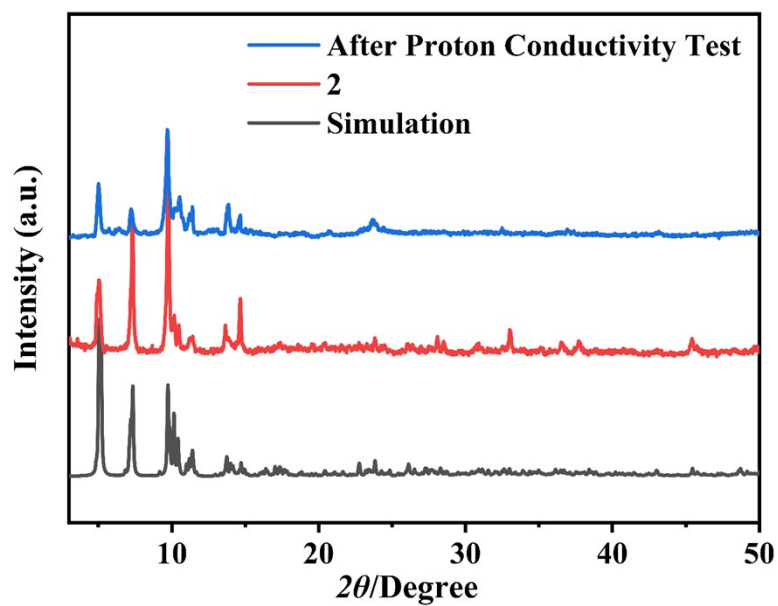

Fig. S25 XRD spectra of 2 before and after measurement.

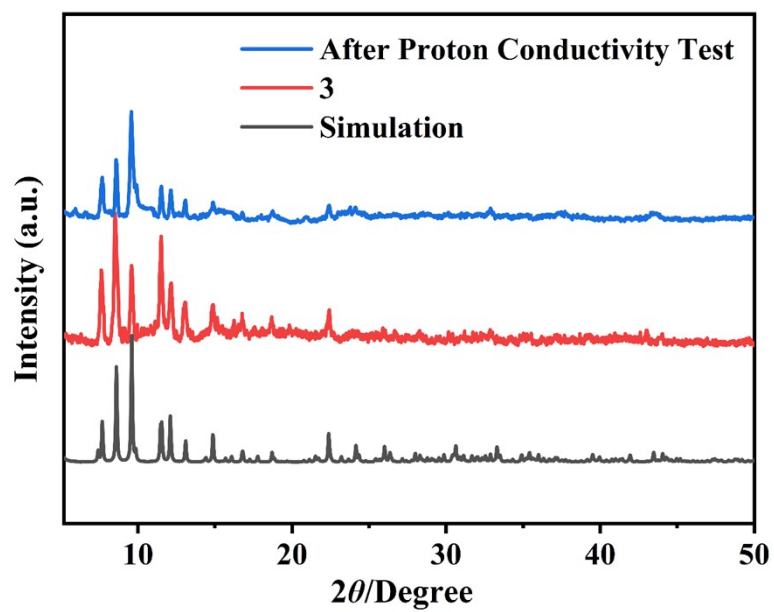

Fig. S26 XRD spectra of **3** before and after measurement.

## 15. References

- 1 O. V. Dolomanov, L. J. Bourhis, R. J. Gildea, J. A. K. Howard and H. Puschmann. “OLEX2: a complete structure solution, refinement and analysis program” . *J. Appl. Cryst.* 2009,**42**, 339-341.
